# Supplementary material for: Pantoea ananatis, A New Bacterial Pathogen Affecting Wheat Plants (Triticum L.) in Poland
Source: MDPI journal article supplement (doi:10.3390/pathogens9121079), 2020-12-21
Supplement: s1 [file s1]

## Supplementary Materials

**Table S1.** BLAST sequence identity (%) of the *gyrB* sequences of the tested strains with other *Pantoea ananatis* sequences derived from the GenBank database.

| Tested strain code /GenBank accession number | Gene tested | Amplicon size (bp) | Identity with the BLAST best hit result (%) | The most similar GenBank derived <i>Pantoea ananatis</i> sequence (accession no) |
|----------------------------------------------|-------------|--------------------|---------------------------------------------|----------------------------------------------------------------------------------|
| Ta024-MT091018                               | <i>gyrB</i> | 864                | 100                                         | CP022427                                                                         |
| Ta027-MT091019                               | <i>gyrB</i> | 864                | 100                                         | CP022427                                                                         |
| Ta030-MT091020                               | <i>gyrB</i> | 864                | 100                                         | MK928262                                                                         |
| Ta046-MT091021                               | <i>gyrB</i> | 864                | 99                                          | MK928262                                                                         |
| OUC1-MT091022                                | <i>gyrB</i> | 864                | 99                                          | MK928262                                                                         |
| ODU2-MT091023                                | <i>gyrB</i> | 864                | 99                                          | MK928262                                                                         |
| OUF2-MT091024                                | <i>gyrB</i> | 864                | 99                                          | MK928262                                                                         |
| OUG1-MT091025                                | <i>gyrB</i> | 864                | 99                                          | MK928262                                                                         |

**Table S2.** BLAST sequence identity (%) of the 16S rRNA sequences of the identified strains with other *Pantoea ananatis* sequences derived from GenBank database.

| Tested strain code /GenBank accession number | Gene tested | Amplicon size (bp) | Identity with the BLAST best hit result (%) | The most similar GenBank derived <i>Pantoea ananatis</i> sequence (accession no) |
|----------------------------------------------|-------------|--------------------|---------------------------------------------|----------------------------------------------------------------------------------|
| Ta024- MH973236                              | 16S rRNA    | 1494               | 99                                          | CP022427                                                                         |
| Ta027- MH973237                              | 16S rRNA    | 1532               | 99                                          | DQ517335                                                                         |
| Ta030- MH973238                              | 16S rRNA    | 1527               | 99                                          | DQ195525                                                                         |
| Ta046- MH973239                              | 16S rRNA    | 1488               | 100                                         | KT957000                                                                         |
| OUC1-MT234395                                | 16S rRNA    | 1445               | 100                                         | MK415050                                                                         |
| ODU2-MT234396                                | 16S rRNA    | 1477               | 100                                         | MK415050                                                                         |
| OUF2-MT234397                                | 16S rRNA    | 1489               | 99                                          | MK415050                                                                         |
| OUG1-MT234398                                | 16S rRNA    | 1443               | 99                                          | MK415050                                                                         |

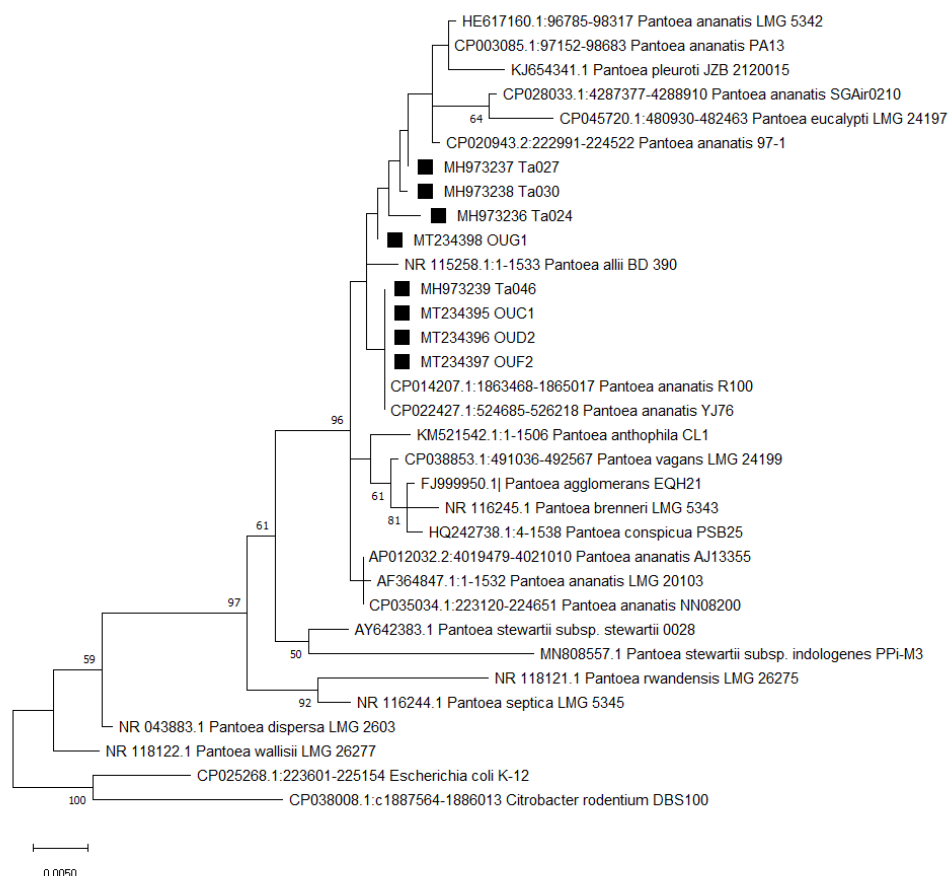

**Figure S1.** Maximum likelihood dendrogram of the partial, GenBank derived a nucleotide sequence of 16S rRNA gene of *Pantoea ananatis* and closely related species. Bootstrap values for phylogenetic comparisons were based on 1000 pseudoreplicates. The Polish strains are marked with black squares (■). *Escherichia coli* and *Citrobacter rodentium* strains were used as an outgroup. The bootstrap values lower than 50 were hidden. Scale bar represents the phylogenetic distance.
